# Supplementary material for: MOFabric: an effective and wearable protective garment towards CWA detoxification
Source: Royal Society of Chemistry journal article supplement (doi:10.1039/d4ra03830d), 2024-01-01
Supplement: d4ra03830d1.pdf [file d4ra03830d1.pdf]

Supporting Information for Publication

**MOFabric: An Effective and Wearable Protective Garment Towards CWAs  
Detoxification**

Selva Balasubramanian <sup>a,b</sup>, Arockia Jayalatha <sup>b</sup>, Apurba Das <sup>c</sup>, and John Bosco Balaguru  
Rayappan <sup>a,b\*</sup>

<sup>a</sup>Centre for Nanotechnology & Advanced Biomaterials (CeNTAB), SASTRA Deemed  
University, Thanjavur, Tamil Nadu - 613 401, India

<sup>b</sup>School of Electrical & Electronics Engineering (SEEE), SASTRA Deemed University,  
Thanjavur, Tamil Nadu - 613 401, India

<sup>c</sup>Department of Textile & Fibre Engineering, Indian Institute of Technology Delhi,  
Hauz Khas, New Delhi – 110 016, India

---

\*Corresponding Author

John Bosco Balaguru Rayappan, Ph.D.

Centre for Nanotechnology & Advanced Biomaterials (CeNTAB) &

School of Electrical & Electronics Engineering

SASTRA Deemed University

Thanjavur – 613 401, Tamil Nadu, India

Phone: +91 4362 350 009; Ext: 2255

Fax: +91 4362 264 120

Email: [rjbosco@ece.sastra.edu](mailto:rjbosco@ece.sastra.edu)

## Section S1: Elemental mapping studies.

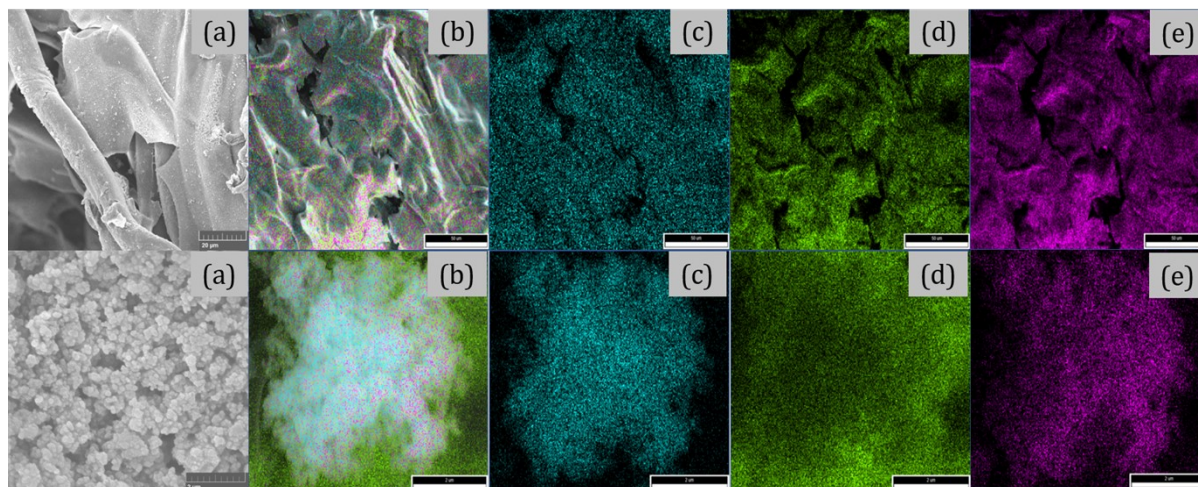

Fig. S1. SEM micrograph & elemental mapping of UiO-66 modified cotton fabric (Top layer) & UiO-66 powder (bottom layer): (a) morphology (b) elements overlay, (c) Zr, (d) C, and, (e) O.

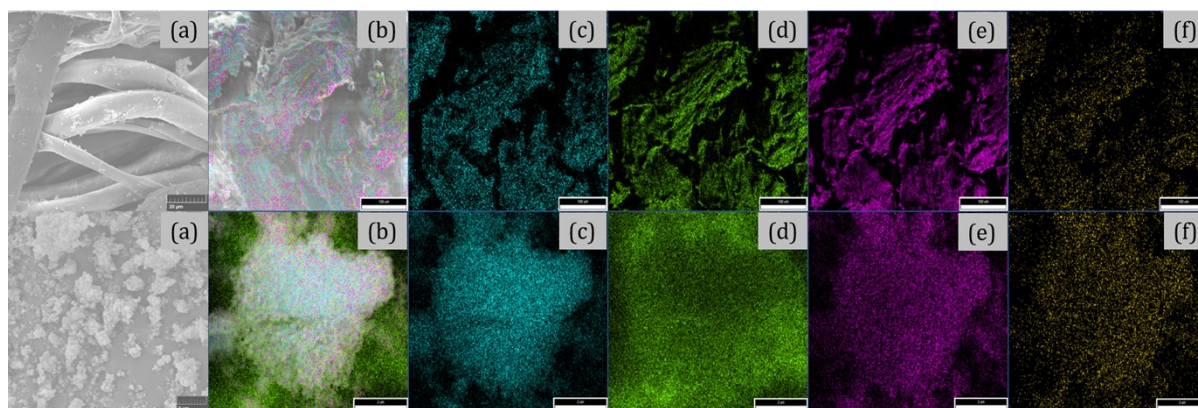

Fig. S2. SEM micrograph & elemental mapping of UiO-66-NH<sub>2</sub> modified cotton fabric (Top layer) & UiO-66-NH<sub>2</sub> powder (bottom layer): (a) morphology (b) elements overlay, (c) Zr, (d) C, (e) O and (f) N.

Table S1: Elemental weight percentage of UiO-66 (powder & fabric) and UiO-66-NH<sub>2</sub> (powder & fabric) samples.

| Sample description     |        | Elements Weight % |       |       |      |
|------------------------|--------|-------------------|-------|-------|------|
|                        |        | Zr                | C     | O     | N    |
| UiO-66                 | Powder | 7.57              | 68.05 | 24.38 | ---  |
|                        | Fabric | 2.52              | 51.53 | 45.95 | ---  |
| UiO-66-NH <sub>2</sub> | Powder | 9.05              | 63.33 | 21.74 | 5.87 |
|                        | Fabric | 2.41              | 50.20 | 44.86 | 2.53 |

Section S2: Chemical composition of UiO-66 (powder & fabric) and UiO-66-NH<sub>2</sub> (powder & fabric) samples.

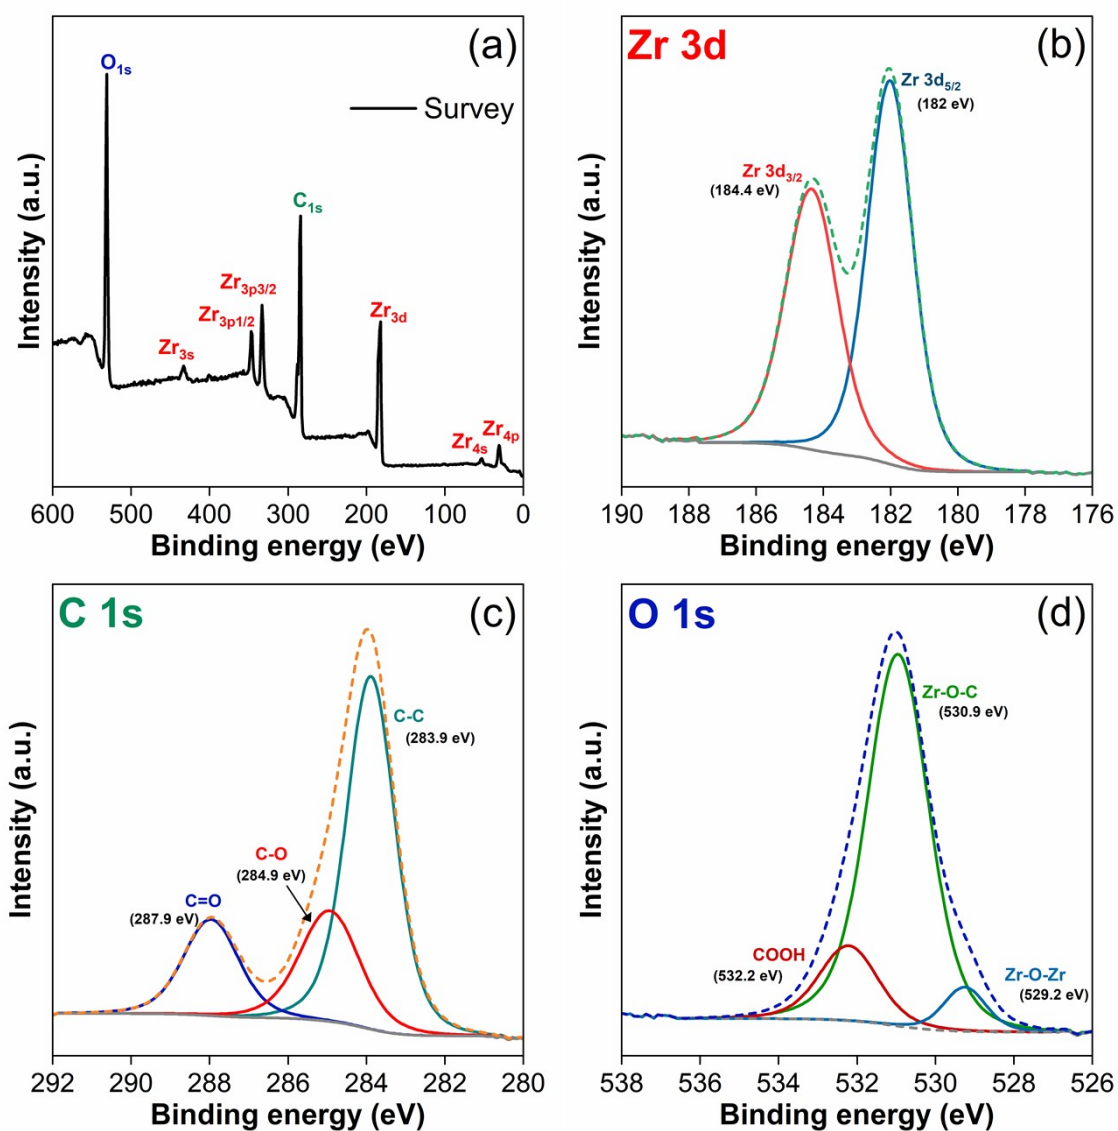

Fig. S3. XPS spectra of UiO-66 powder samples. (a) survey, (b) Zr, (c) C, and (d) O.

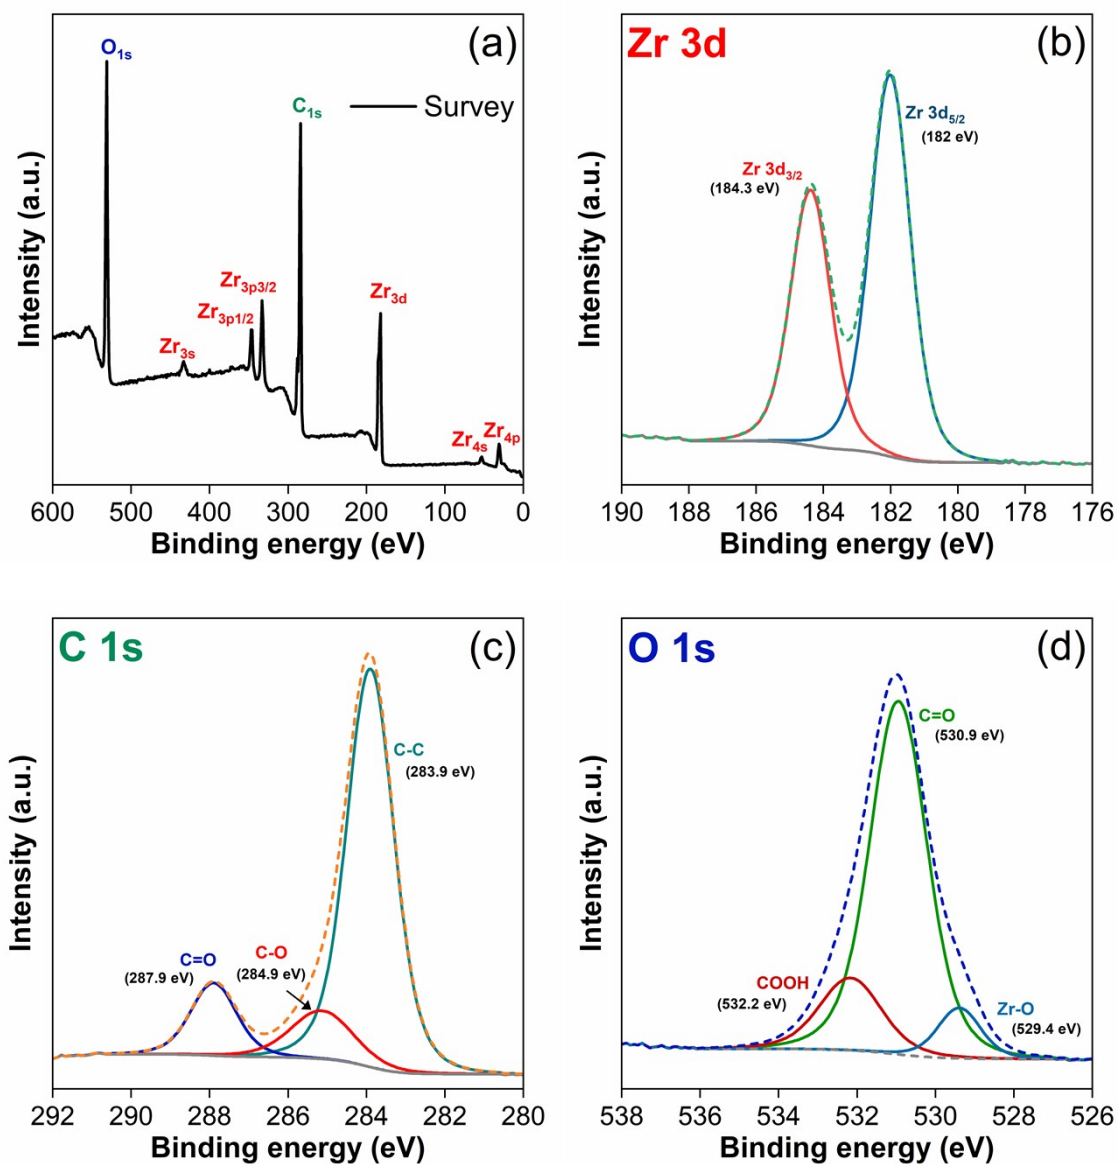

Fig. S4. XPS spectra of UiO-66 fabric samples. (a) survey, (b) Zr, (c) C, and (d) O.

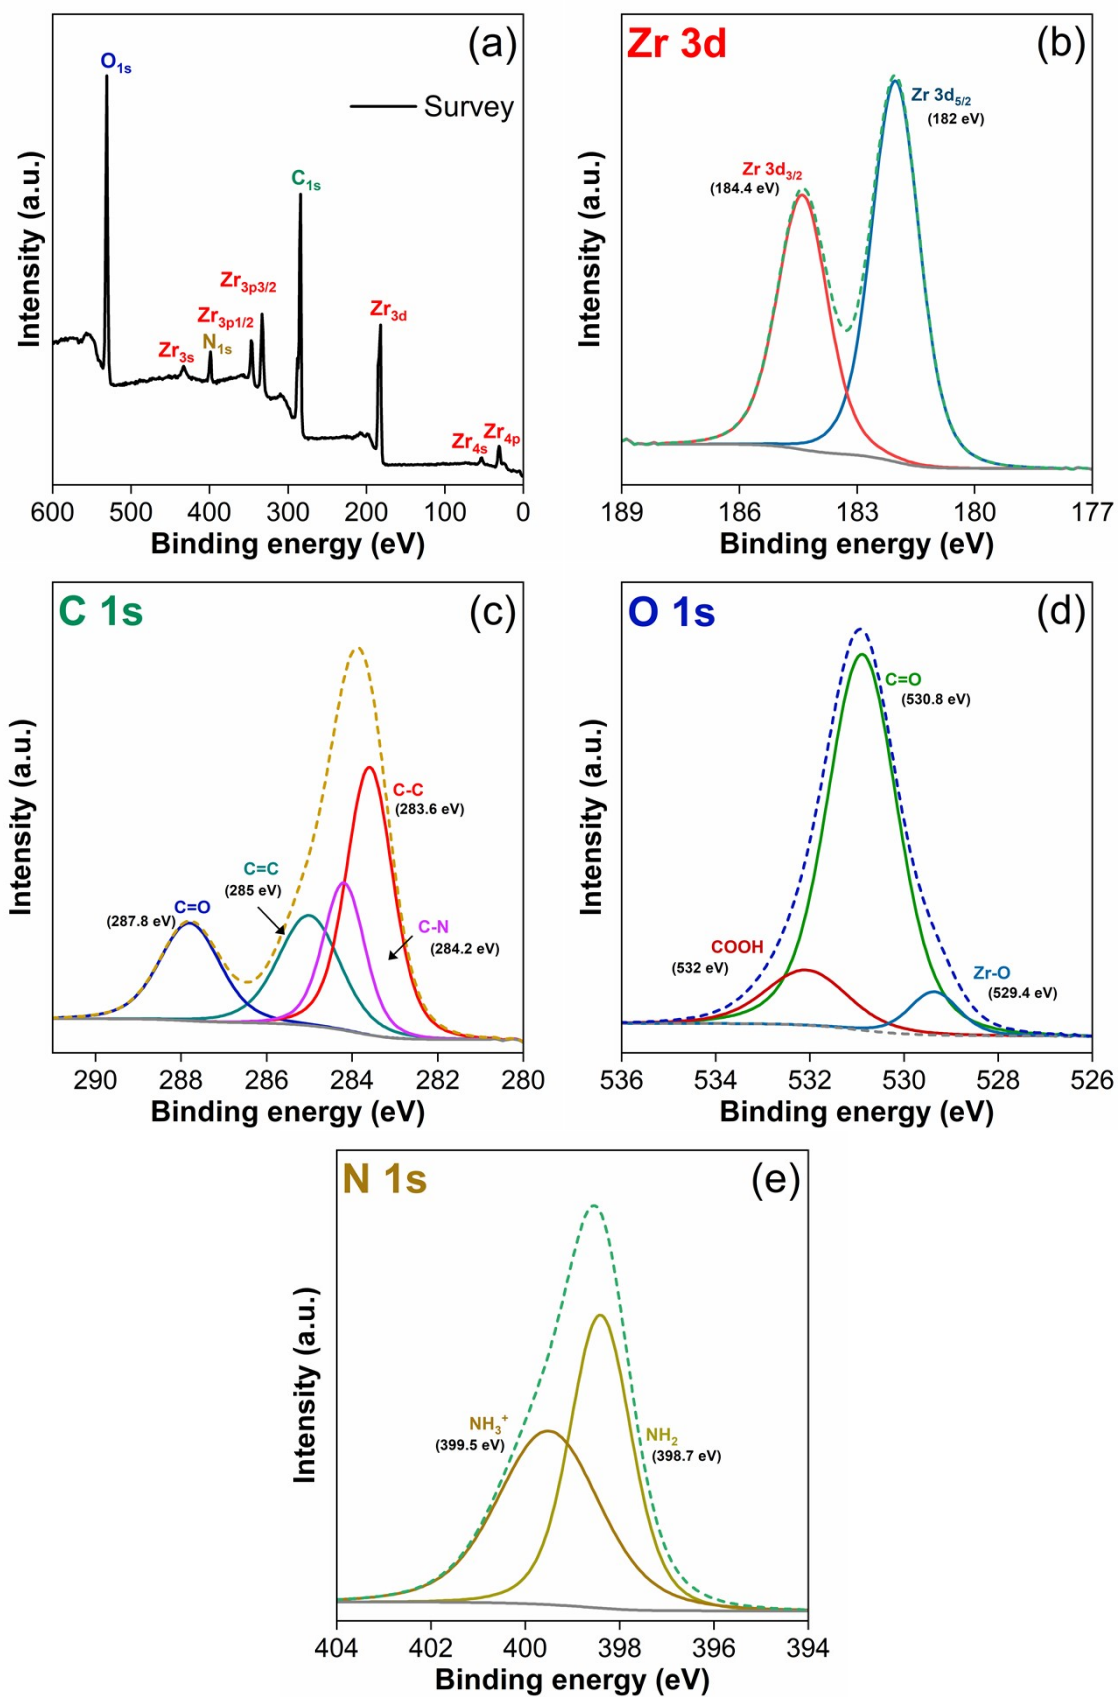

Fig. S5. XPS spectra of UiO-66-NH<sub>2</sub> powder samples. (a) survey, (b) Zr, (c) C, (d) O, and (e) N.

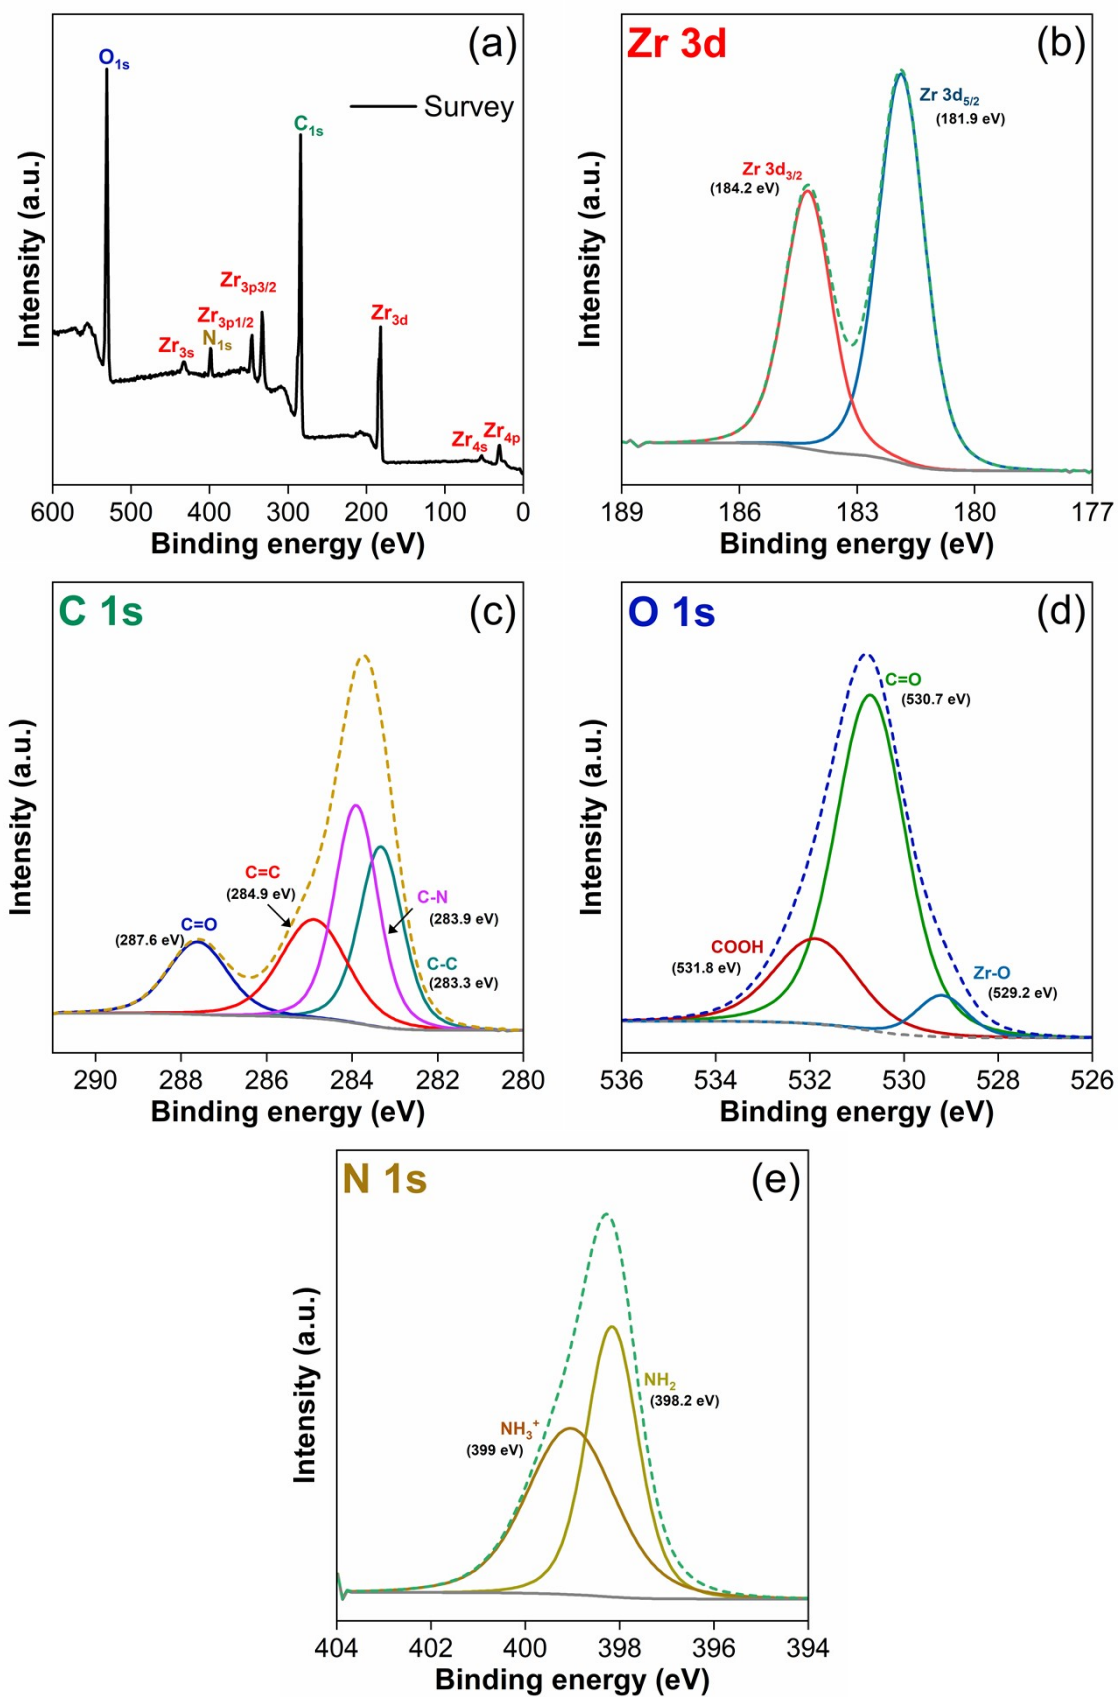

Fig. S6. XPS spectra of UiO-66-NH<sub>2</sub> fabric samples. (a) survey, (b) Zr, (c) C, (d) O, and (e)

N.

Table S2: Chemical composition of UiO-66 (powder & fabric) and UiO-66-NH<sub>2</sub> (powder & fabric) samples.

| Sample Description |        | Zr 3d                |                      | O 1S  |        |         | C 1S  |       |       |
|--------------------|--------|----------------------|----------------------|-------|--------|---------|-------|-------|-------|
|                    |        | Zr 3d <sub>5/2</sub> | Zr 3d <sub>3/2</sub> | COOH  | Zr-O-C | Zr-O-Zr | C=O   | C-O   | C-C   |
| UiO-66             | Powder | 56.18                | 43.82                | 15.07 | 78.48  | 6.45    | 18.35 | 22.68 | 58.97 |
|                    | Fabric | 60.19                | 39.81                | 16.66 | 75.30  | 8.04    | 13.23 | 11.96 | 74.81 |

Table S3: Chemical composition of UiO-66 (powder & fabric) and UiO-66-NH<sub>2</sub> (powder & fabric) samples.

| Sample Description     |        | Zr 3d                |                      | O 1S  |       |      | C 1S  |       |       |       | N 1S            |                              |
|------------------------|--------|----------------------|----------------------|-------|-------|------|-------|-------|-------|-------|-----------------|------------------------------|
|                        |        | Zr 3d <sub>5/2</sub> | Zr 3d <sub>3/2</sub> | COOH  | C=O   | Zr-O | C=O   | C=C   | C-N   | C-C   | NH <sub>2</sub> | NH <sub>3</sub> <sup>+</sup> |
| UiO-66-NH <sub>2</sub> | Powder | 58.65                | 41.35                | 13.66 | 79.86 | 6.48 | 18.89 | 21.77 | 19.55 | 39.88 | 50.44           | 49.56                        |
|                        | Fabric | 59.93                | 40.07                | 21.83 | 71.79 | 6.38 | 15.46 | 23.32 | 33.42 | 27.80 | 48.85           | 51.15                        |

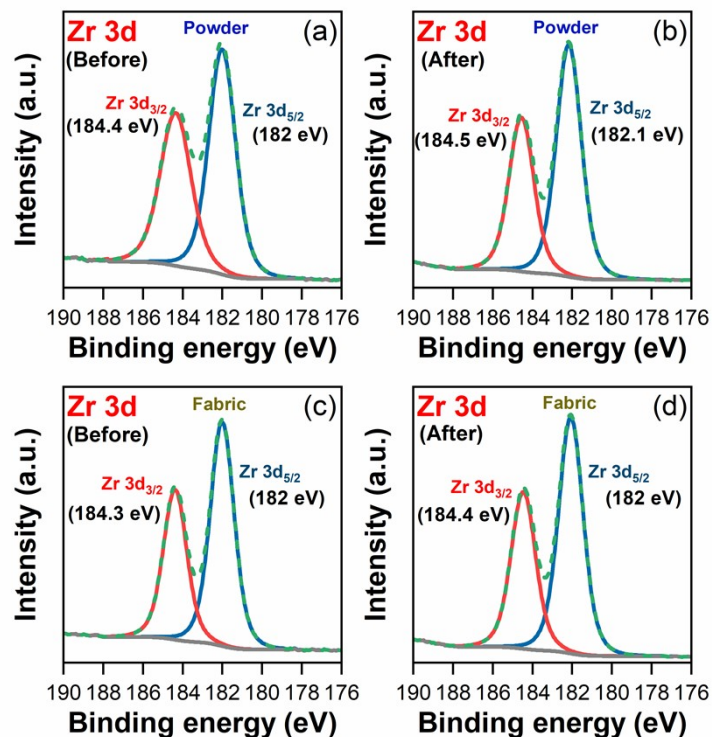

Fig. S7. High resolution spectra of Zr 3d before and after DMNP hydrolysis. (a) & (b) UiO-66 powder samples, and (c) & (d) UiO-66 fabric samples.

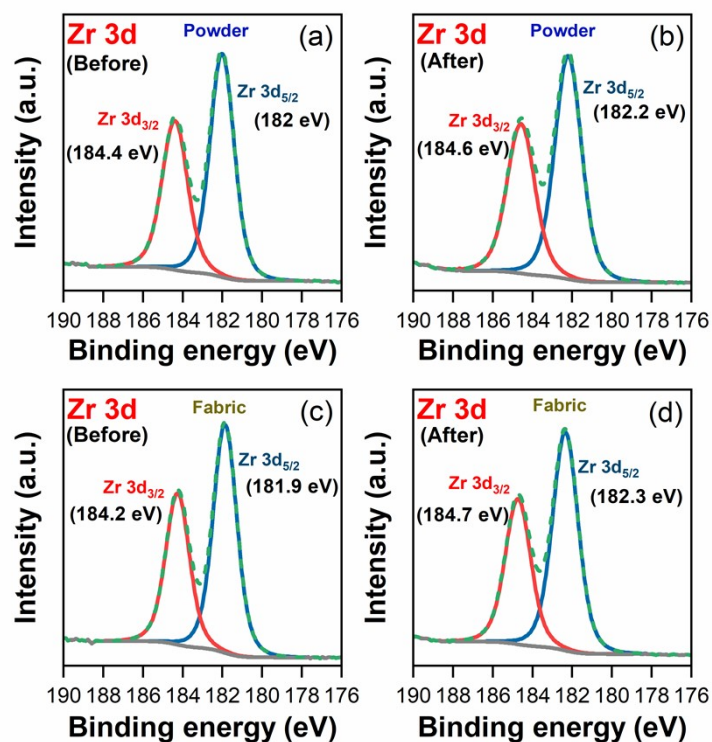

Fig. S8. High resolution spectra of Zr 3d before and after DMNP hydrolysis. (a) & (b) UiO-66-NH<sub>2</sub> powder samples, and (c) & (d) UiO-66-NH<sub>2</sub> fabric samples.
